# Supplementary material for: Native and fluorescent dye-dependent single-DNA molecule microchip dynamics as measured by differential interference contrast microscopy
Source: Royal Society of Chemistry journal article supplement (doi:10.1039/c1cc12911b), 2011-01-01
Supplement: c1cc12911b.pdf [file c1cc12911b.pdf]

## SUPPLEMENTARY INFORMATION

### **Native and fluorescent dye-dependent single-DNA molecule microchip dynamics as measured by differential interference contrast microscopy**

**Doori Oh,<sup>a</sup> Seungah Lee,<sup>b</sup> and Seong Ho Kang<sup>\*b</sup>**

<sup>a</sup>*Department of Chemistry, Chonbuk National University, Jeonju 561-756, South Korea*

<sup>b</sup>*Department of Applied Chemistry, College of Applied Science, Kyung Hee University, Yongin-si, Gyeonggi-do 446-701, South Korea. E-mail: shkang@khu.ac.kr; Tel: +82 31 201 3349*

The AVI movie files show the dynamics of a single DNA molecule intercalated with YOYO-1 (Fig. 1A(a), movie M1) and a single native-DNA molecule (Fig. 1A(b), movie M2) under an applied electric field along the microchannel as described in Fig. 1.

## Experimental

### Chemicals and reagents

A 10.0 mM Gly-Gly (Sigma, St. Louis, MO, USA) buffer solution was prepared by dissolving in deionized water (pH 8.2). The microchip dynamic coating was made by dissolving 1.0% (w/v) of polyvinylpyrrolidone (PVP,  $M_r = 1\,000\,000$ ; Polysciences Inc., Warrington, England) in Gly-Gly buffer. The mixture was vigorously shaken for 2 min and then allowed to stand for 2 h to remove bubbles.  $\lambda$ -DNA ( $M_w = 48\,502$  bp) was obtained from Promega (Madison, WI, USA). YOYO-1 intercalating dye was purchased from Molecular Probes (Eugene, OR, USA). All chemicals were A.C.S. grade. All solutions were filtered through a 0.2  $\mu\text{m}$  membrane filter and photobleached overnight using a UV-B lamp.

### DNA sample preparation

For fluorescence detection, the  $\lambda$ -DNA sample was labeled with the YOYO-1 intercalator at a 1:5 molar ratio of dye to nucleotide pairs (bp) in 10.0 mM Gly-Gly buffer solution. For DIC detection,  $\lambda$ -DNA samples were prepared in 10.0 mM Gly-Gly buffer without YOYO-1. The DNA sample was further diluted to 100.0 fM using 10.0 mM Gly-Gly buffer solution prior to the start of single molecule imaging experiments.

### Preparation of microchips for DNA detection by DIC

DIC system experiments were performed using customized glass (quartz) microfluidic chips designed with a 610.0  $\mu\text{m}$  thickness manufactured by DBT (Digital Bio Technology Co., Seoul, Korea) for this research. The 70.0  $\times$  18.0 mm microchip consisted of a 60.0 mm long separation channel and side arms 4.0 mm long (ESI†, Fig. S2B). The injection design was a double-T channel with a 300.0  $\mu\text{m}$  offset (ESI†, Fig. S2A). The channel was 100.0  $\mu\text{m}$  in width and 5.0  $\mu\text{m}$  in depth. The reservoirs were 2.0 mm in diameter and 1.0 mm deep (ESI†, Fig. S2C). The injection and separation channel length was 60.0 mm from reservoir 1 to reservoir 3. DNA injection was conducted by capillary force after dynamically coating or filling the inner wall of channel with 1.0% PVP to suppress adsorption of the DNA sample and electroosmotic flow (EOF). Detection was measured 30.0 mm from the injection reservoir (ESI†, Fig. S2D).

### Differential interference contrast microscopic system with a temperature controller

The DIC system consisted of an upright Olympus BX51 microscope (Olympus Optical Co., Ltd., Tokyo, Japan)

equipped with a DIC slider (U-DICT, Olympus) and a 40× objective lens (Olympus UPlanFI 40×/0.75 N.A., W.D. 0.51). For real-time single-molecule detection, a CCD camera (QuantEM: 512SC, Photometrics, Tucson, AZ, USA) was installed to the top of the microscope. Camera exposure time was 10-50 ms. Temperature was applied from 20 °C to 40 °C using a temperature controller (CU-201, Live Cell Instruments, Seoul, Korea) placed on the stage of the upright microscope. Electrophoresis and manipulation of DNA molecules were performed with a high-voltage power supply (DBHV-100, Digital Bio Technology Co., Ltd., Seoul, South Korea). DNA samples were driven at 16.7-166.7 V/cm. MetaMorph 7.0 software (Universal Imaging Co., Downingtown, PA, USA) was used for image collection and data processing.

**Table S1** Velocity of native DNA molecules in microchannels based on changing temperature (°C) and electric field (V/cm)

| Electric field<br>(V/cm) | Velocity ( $\mu\text{m/s}$ ) <sup>a</sup> |             |            |            |            |
|--------------------------|-------------------------------------------|-------------|------------|------------|------------|
|                          | 20 °C                                     | 25 °C       | 30 °C      | 35 °C      | 40 °C      |
| 16.7                     | 8.6±0.4                                   | 25.5±2.0    | 31.0±4.2   | 36.2±3.0   | 40.6±3.5   |
| 33.3                     | 14.3±4.2                                  | 45.3±5.5    | 53.8±2.2   | 77.5±3.8   | 87.2±4.5   |
| 50.0                     | 32.5±3.5                                  | 64.4±6.0    | 89.3±7.9   | 129.1±12.1 | 131.4±0.0  |
| 66.7                     | 45.8±9.2                                  | 67.1±0.0    | 130.6±14.1 | 171.0±18.1 | 184.3±0.8  |
| 83.3                     | 70.7±5.2                                  | 71.5±10.8   | 167.7±12.7 | 202.6±11.3 | 234.2±8.9  |
| 100.0                    | 76.2±8.7                                  | 91.7±6.3    | 219.0±11.7 | 222.6±0.0  | 278.0±16.1 |
| 116.7                    | 93.4±6.2                                  | 126.8 ±14.1 | 259.0±23.9 | 269.6±16.1 | 399.8±19.8 |
| 133.3                    | 108.0±12.7                                | 162.8 ±2.2  | 319.1±23.7 | 359.9±20.7 | 537.3±24.8 |
| 150.0                    | 116.2±3.6                                 | 184.4 ±9.6  | 339.5±21.8 | 412.8±22.4 | 573.4±26.0 |
| 166.7                    | 116.2±8.1                                 | 193.9±0.8   | 381.1±14.8 | 526.2±15.3 | 674.1±19.1 |

<sup>a</sup>Velocity of the mean±standard deviation of 5 measurements.

\*DNA flow direction is in the same direction of EOF.

**Table S2** The ratio of net velocity of DNA in microchannels based on changing temperature (°C) and electric field (V/cm)

| Electric field<br>(V/cm) | Ratio of net velocity (Native DNA/YOYO-DNA) |       |       |       |       |
|--------------------------|---------------------------------------------|-------|-------|-------|-------|
|                          | 20 °C                                       | 25 °C | 30 °C | 35 °C | 40 °C |
| 16.7                     | 1.3                                         | 2.7   | 1.5   | 1.4   | 0.9   |
| 33.3                     | 0.9                                         | 1.6   | 1.4   | 1.8   | 1.7   |
| 50.0                     | 1.5                                         | 1.6   | 1.6   | 1.9   | 1.8   |
| 66.7                     | 1.7                                         | 1.4   | 1.7   | 1.8   | 1.9   |
| 83.3                     | 1.4                                         | 1.3   | 1.7   | 2.0   | 1.6   |
| 100.0                    | 1.0                                         | 1.2   | 2.1   | 1.8   | 1.6   |
| 116.7                    | 1.0                                         | 1.1   | 1.8   | 1.5   | 1.9   |
| 133.3                    | 1.1                                         | 1.1   | 1.9   | 1.9   | 2.0   |
| 150.0                    | 0.8                                         | 1.3   | 1.7   | 1.8   | 2.0   |
| 166.7                    | 0.7                                         | 1.0   | 1.5   | 1.8   | 2.2   |

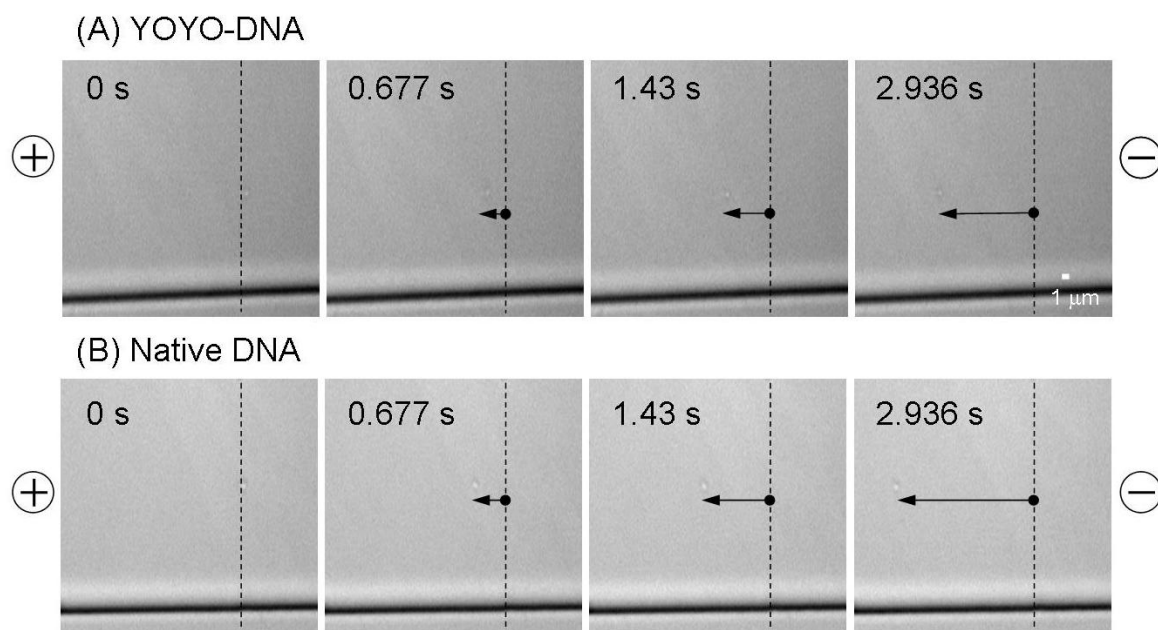

**Fig. S1** DIC images of a single flowing (A) DNA molecule intercalated with YOYO-1 (YOYO-DNA) and (B) a native-DNA molecule under an applied electric field strength of 16.7 V/cm in a glass microchip filled with a 1.0% PVP ( $M_r = 1\,000\,000$ ) sieving gel matrix. DIC conditions: camera, QuantEM:512SC; exposure time, 50 ms; objective lens, Olympus UPlanFl 40 $\times$ /0.75 N.A., W.D. 0.51; temperature, 25  $^{\circ}$ C, sieving gel, 1.0% PVP ( $M_r = 1\,000\,000$ ); microchip, 100.0  $\mu$ m width by 5.0  $\mu$ m depth. Black arrow, flow direction of  $\lambda$ -DNA; dotted line,  $\lambda$ -DNA position at steady state.

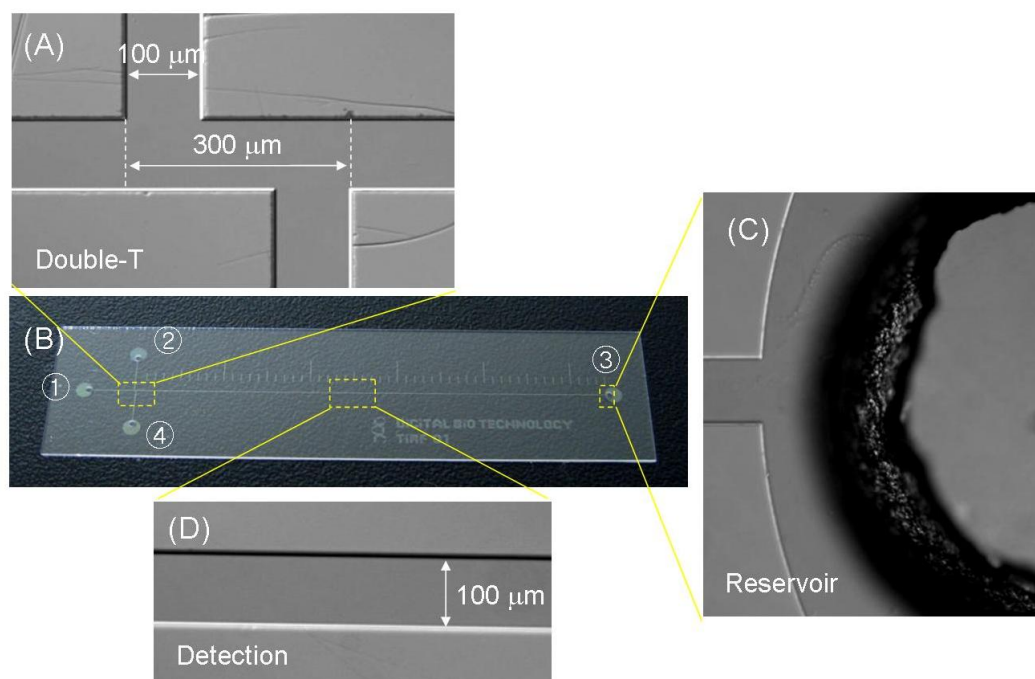

**Fig. S2** Microchip for the detection of single native-DNA and YOYO-DNA molecules by DIC microscopy. (A) DIC image of the double-T section of the microchip, (B) photograph of the entire glass microchip, and DIC images of the (C) reservoir and (D) detection section at the microchip.
